# Supplementary material for: Kinetic analysis of low concentration CO detection by Au-loaded cerium oxide sensors
Source: Royal Society of Chemistry journal article supplement (doi:10.1039/c6ra18547a), 2016-01-01
Supplement: c6ra18547a1.pdf [file c6ra18547a1.pdf]

## Supplementary Information

### Kinetic Analysis of Low Concentration CO Detection by Au-loaded Cerium Oxide Sensors

DeblinaMajumder<sup>a</sup>, AparnaDatta<sup>b</sup>, Manoj Kumar Mitra<sup>c</sup>, SomenathRoy<sup>a\*</sup>

- Sensor and Actuator Division, CSIR-Central Glass and Ceramic Research Institute, 196, Raja S.C. Mullick Road, Kolkata 700032, West Bengal, India
- School of Materials Science and Nanotechnology, Jadavpur University, 188, Raja S.C. Mullick Road, Kolkata 700032, West Bengal, India
- Department of Metallurgical and Material Engineering, Jadavpur University, 188, Raja S.C. Mullick Road, Kolkata 700032, West Bengal, India

\* Corresponding author. Email: sroy@cgcri.res.in

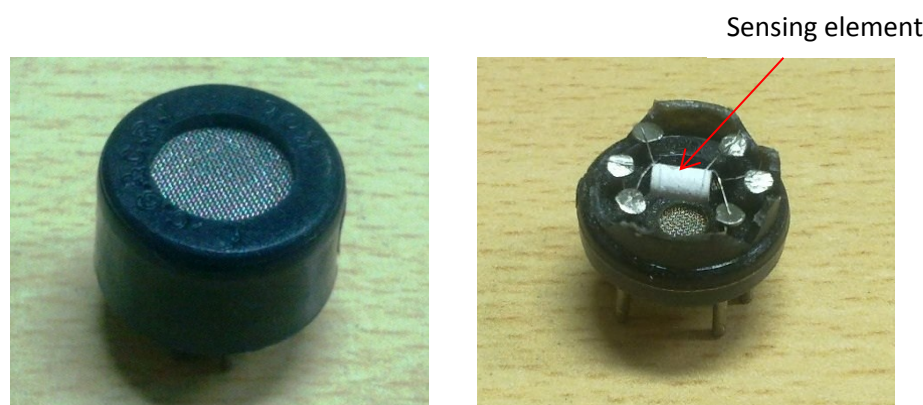

Fig.S1: Packaged CO sensor

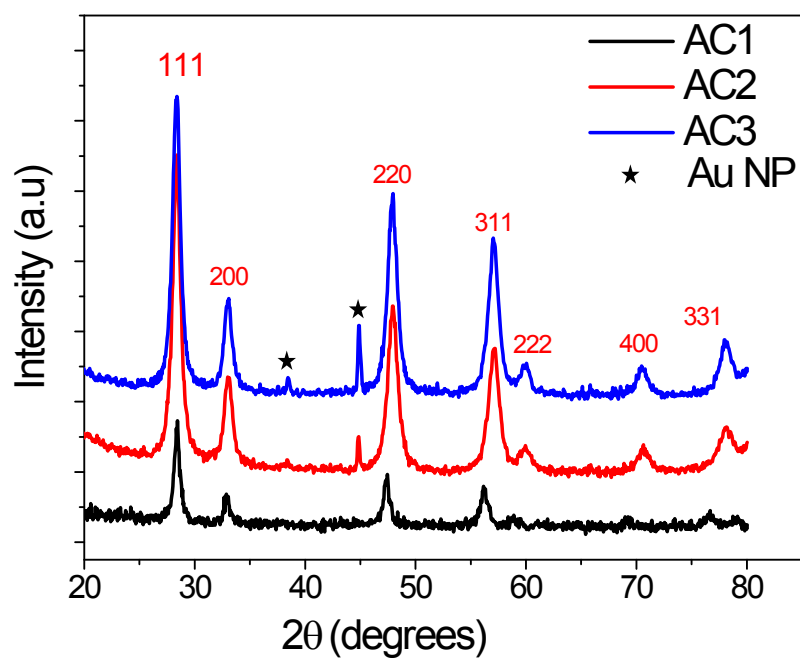

Fig.S2: XRD pattern of Au NP loaded CeO<sub>2</sub> nanoparticles

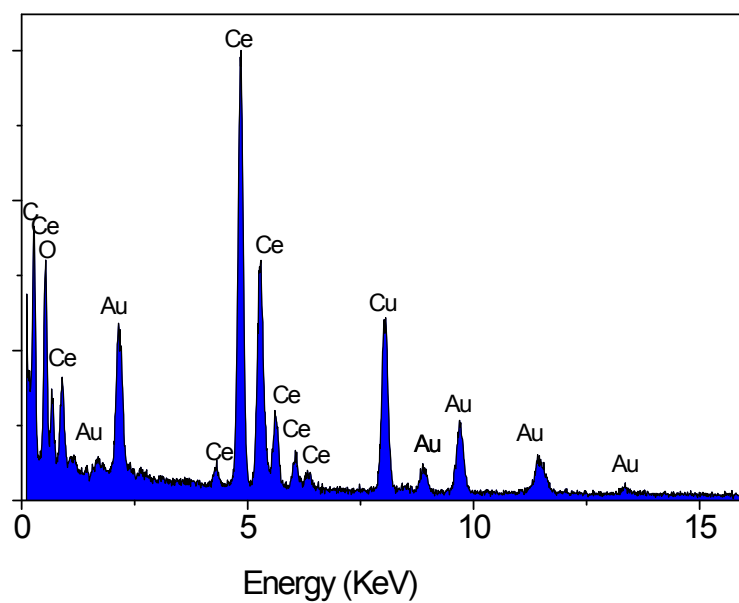

**Fig.S3:** EDAX of Au decorated CeO<sub>2</sub> surface
